# Supplementary material for: Genome-wide identification of direct HBx genomic targets
Source: Springer Nature journal article supplement (doi:10.1186/s12864-017-3561-5), 2017-02-17
Supplement: MOESM1 [file 12864_2017_3561_MOESM1_ESM.pdf]

## Supplementary Files

### Genome-wide identification of direct HBx targets that control HBV replication

Francesca Guerrieri<sup>1,2</sup>, Laura Belloni<sup>1,2</sup>, Daniel D'Andrea<sup>3</sup>, Natalia Pediconi<sup>4</sup>, Loredana Le Pera<sup>1,3</sup>, Barbara Testoni<sup>4</sup>, Cecilia Scisciani<sup>2</sup>, Oceane Floriot<sup>5</sup>, Fabien Zoulim<sup>5</sup>, Anna Tramontano<sup>1,3,6</sup>, Massimo Levrero<sup>1,2,5</sup>

<sup>1</sup> Center for Life NanoScience@Sapienza, Istituto Italiano di Tecnologia, Rome, Italy

<sup>2</sup> Dept of Internal Medicine - DMISM, Sapienza University, Rome Italy

<sup>3</sup> Biocomputing Lab, Department of Physics, Sapienza University of Rome, Italy

<sup>4</sup> Dept of Molecular Medicine, Sapienza University, Rome, Italy

<sup>5</sup> INSERM U1052, Cancer Research Center of Lyon (CRCL), Lyon, 69008, France

<sup>6</sup> Istituto Pasteur Fondazione Cenci Bolognetti, Rome, Italy

### Table of contents:

pages 2-7: Supplementary Figures

pages 8-14: Supplementary Tables

**a**

| Exp | Name     | #Good unique reads | #Uniquely mapped reads | %Uniquely mapped reads |
|-----|----------|--------------------|------------------------|------------------------|
| SAP | Input    | 33,167,085         | 25,687,082             | 77                     |
| SAP | HBx_wt_1 | 29,109,646         | 21,261,284             | 73                     |
| SAP | HBx_wt_2 | 13,090,991         | 7,994,287              | 61                     |
| IFO | Input    | 17,516,410         | 12,157,995             | 69                     |
| IFO | HBx_wt_1 | 17,148,341         | 7,996,242              | 47                     |
| IFO | HBx_wt_3 | 15,629,897         | 7,141,652              | 46                     |

**b**

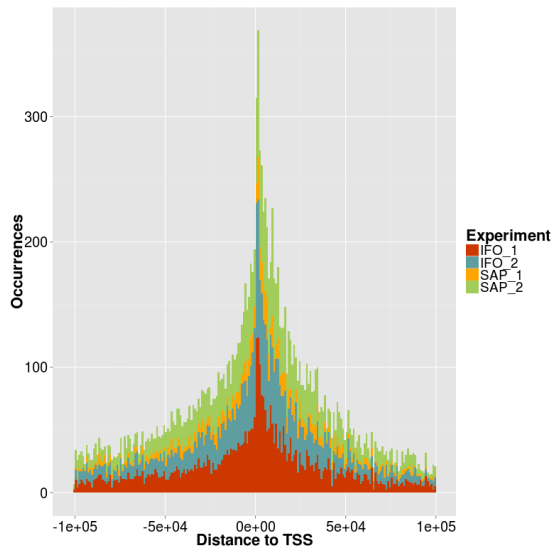

**c**

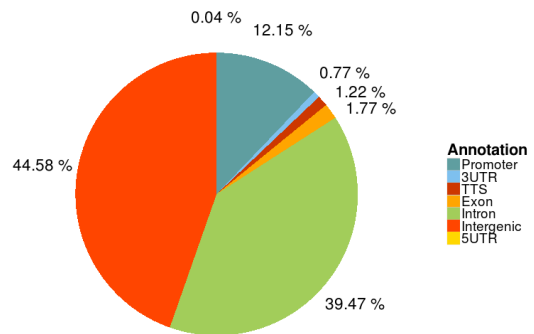

**d**

| Hsa-miR              | fdr         | Hsa-miR             | fdr         | Hsa-miR        | fdr  | Hsa-miR              | fdr         |
|----------------------|-------------|---------------------|-------------|----------------|------|----------------------|-------------|
| Hsa-miR-224          | 0           | Hsa-miR-3139        | 0.24        | Hsa-miR-4698   | 0.76 | Hsa-miR-3617         | 1.75        |
| Hsa-miR-452          | 0           | Hsa-miR-548p        | 0.24        | Hsa-miR-640    | 0.79 | Hsa-miR-944          | 1.80        |
| Hsa-miR-21           | 0           | Hsa-miR-302e        | 0.25        | Hsa-miR-4740   | 0.80 | <b>Hsa-miR-26a-2</b> | <b>2.14</b> |
| Hsa-miR-3648         | 0           | Hsa-miR-663a        | 0.29        | Hsa-miR-4662b  | 0.80 | Hsa-miR-4488         | 2.15        |
| Hsa-miR-576          | 0.14        | Hsa-miR-138-2       | 0.30        | Hsa-miR-5698   | 0.82 | Hsa-miR-3197         | 2.26        |
| Hsa-miR-1913         | 0.14        | <b>Hsa-miR-551b</b> | <b>0.36</b> | Hsa-miR-4681   | 0.82 | Hsa-miR-4770         | 2.42        |
| Hsa-miR-26b          | 0.15        | Hsa-miR-5095        | 0.47        | Hsa-miR-584    | 0.84 | Hsa-miR-543          | 2.76        |
| Hsa-miR-5588         | 0.15        | Hsa-miR-4682        | 0.51        | Hsa-miR-4648   | 0.87 | Hsa-miR-495          | 2.76        |
| Hsa-miR-3691         | 0.15        | Hsa-miR-1539        | 0.55        | Hsa-miR-3650   | 0.88 | Hsa-miR-4664         | 3.54        |
| Hsa-miR-4703         | 0.16        | Hsa-miR-4429        | 0.59        | Hsa-miR-133a-2 | 0.89 | Hsa-miR-4317         | 3.73        |
| Hsa-miR-5193         | 0.16        | Hsa-miR-663b        | 0.59        | Hsa-miR-3914-1 | 0.95 | Hsa-miR-4321         | 3.87        |
| Hsa-miR-943          | 0.16        | Hsa-miR-663a        | 0.63        | Hsa-miR-3170   | 0.95 | <b>Hsa-miR-3648</b>  | <b>11.1</b> |
| <b>Hsa-miR-129-1</b> | <b>0.16</b> | Hsa-miR-4666a       | 0.67        | Hsa-miR-548a-2 | 1.04 | <b>Hsa-miR-3687</b>  | <b>11.1</b> |
| <b>Hsa-miR-552</b>   | <b>0.17</b> | <b>Hsa-miR-3648</b> | <b>0.69</b> | Hsa-miR-3622b  | 1.18 | Hsa-miR-4448         | 37.5        |
| Hsa-miR-3657         | 0.17        | <b>Hsa-miR-3687</b> | <b>0.69</b> | Hsa-miR-4286   | 1.22 | Hsa-miR-3916         | 37.6        |
| Hsa-miR-1973         | 0.17        | Hsa-miR-639         | 0.69        | Hsa-miR-555    | 1.23 | Hsa-miR-4442         | 37.9        |
| Hsa-miR-4276         | 0.17        | <b>Hsa-miR-596</b>  | <b>0.70</b> | Hsa-miR-4429   | 1.24 | Hsa-miR-4446         | 38.0        |
| Hsa-miR-3909         | 0.18        | Hsa-miR-4501        | 0.71        | Hsa-miR-4425   | 1.25 | Hsa-miR-4438         | 43.1        |
| Hsa-miR-4476         | 0.18        | Hsa-miR-378g        | 0.73        | Hsa-miR-4309   | 1.29 |                      |             |
| Hsa-miR-1244-2       | 0.20        | Hsa-miR-3667        | 0.73        | Hsa-miR-639    | 1.73 |                      |             |
| Hsa-miR-626          | 0.22        | Hsa-miR-4710        | 0.74        | Hsa-miR-5006   | 1.74 |                      |             |

**Figure S1. HBx ChIP-Seq experiments analysis.** Libraries were sequenced using the Illumina Genome Analyzer II (two IFO libraries) or the Genome Analyzer IIx (two SAP libraries). Total input DNA from each experiment served as control sample. *a)* Number of reads obtained in the different experiments; *b)* Histogram showing the distribution of peaks with respect to the Transcription Start Site (TSS); *c)* Distribution of HBx peaks in the different genomic regions. *d)* list of the 75 HBx targeted miRNA promoters sorted according to their False Discovery Rate (FDR).

**a**

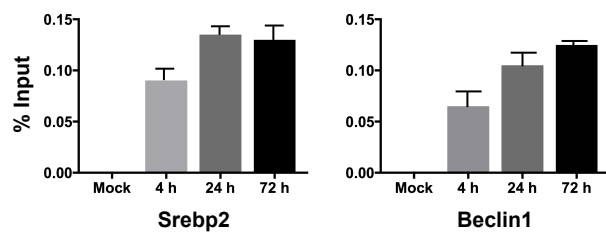

**b**

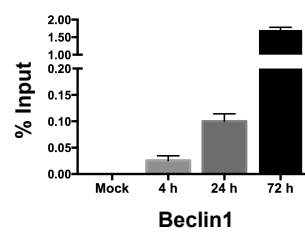

**Figure S2. HBx occupancy on cellular promoters in: a) NTCP-HepG2 cells and b) PHHs infected with HBV-wt virus.** Anti-HBx ChIPed chromatin from NTCP-HepG2 cells (a) and PHHs (b) infected with HBV-wt virus is analyzed with primers specific for the SREBP2 and Beclin-1 promoters. ChIP results are expressed as % of Input. Histograms show the mean from two independent experiments; bars indicate SD.

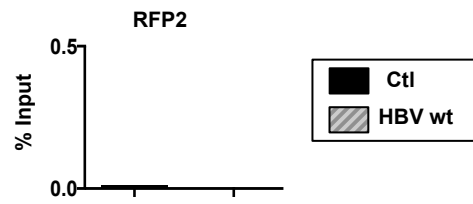

**Figure S3. HBx occupancy on the control RFP2 promoter.** HBx occupancy on the RFP2 promoter showed no HBx enrichment in independent ChIP experiments. Results are expressed as in Figure S2.

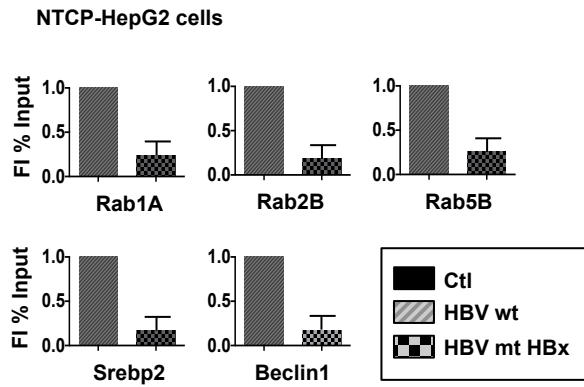

**Figure S4. HBx occupancy on cellular promoters in NTCP-HepG2 cells infected with wild-type and mt-HBx HBV.** Anti-HBx ChIPed chromatin from NTCP-HepG2 cells infected with HBV-wt and HBV-mt-HBx virus is analyzed with primers specific for the RAB1A, RAB2B, RAB5B, Beclin-1 and SREBP2 promoters. ChIP results are expressed as Fold Induction (FI) of the % of Input. Histograms show the mean from three independent experiments; bars indicate SD.

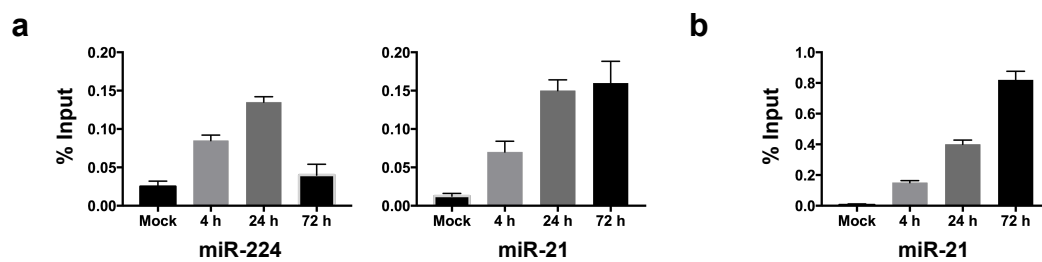

**Figure S5. HBx occupancy on miRNAs promoters in: a) NTCP-HepG2 cells and b) PHHs infected with HBV-wt virus.** Anti-HBx ChIPed chromatin from NTCP-HepG2 cells (a) and PHHs (b) infected with HBV-wt virus is analyzed with primers specific for the miR-224 and miR-21 promoters. Results are expressed as in Figure S2.

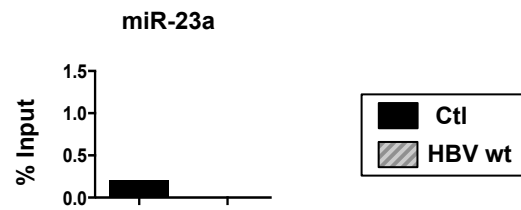

**Figure S6. CHIP validation of high P value HBx peak.** HBx occupancy on miR-23a (peak P value =1E-3) showed no enrichment in anti-HBx in an independent CHIP validation experiment. Results are expressed as in Figure S2.



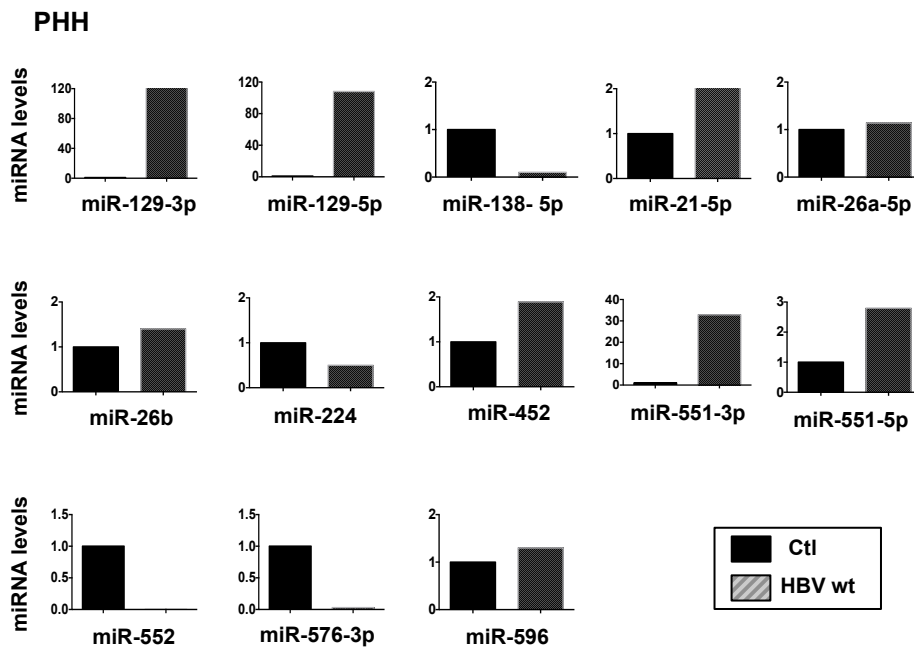

**Figure S7. HBx targeted miRNAs expression in HBV-infected Primary Human Hepatocytes.** miRNAs expression was analysed by Taqman PCR-arrays in HBV infected (12 dpi) Primary Human hepatocytes (PHH).

**Table S1**  
Rab family & ATG family table

| <b>Genes</b>                                                                                                              | <b>Location</b> |
|---------------------------------------------------------------------------------------------------------------------------|-----------------|
| RAB1A, RAB2B, RAB5A, RAB6C, RAB8A, RAB12, RAB27A, RAB28, RAB31, RAB38, RAB11FIP2, RAB11FIP3                               | Promoter        |
| RAB3B, RAB3C, RAB3D, RAB4A, RAB5B, RAB8BA, RAB8B, RAB10, RAB18, RAB27A, RAB28, RAB31P, RAB37, RAB32, RAB11FIP3, RAB11FIP5 | In gene         |
| ATG4B                                                                                                                     | Promoter        |
| ATG3, ATG4B, ATG5, ATG7, ATG9A, ATG10, ATG16L1, ATG9B                                                                     | In gene         |

**Table S2**  
HBx targeted miRNAs functions (PubMed)

| Gene           | Liver | HCC | HBV | Cancer | NA | Other |
|----------------|-------|-----|-----|--------|----|-------|
| hsa-mir-1244-2 |       |     |     |        |    | X     |
| hsa-mir-129-1  | X     | X   | X   | X      |    |       |
| hsa-mir-133a-2 |       | X   |     | X      |    |       |
| hsa-mir-138-2  |       | X   | X   | X      |    |       |
| hsa-mir-1539   |       |     |     | X      |    |       |
| hsa-mir-1913   |       |     |     |        | X  |       |
| hsa-mir-1973   |       |     |     | X      |    |       |
| hsa-mir-21     | X     | X   | X   | X      |    |       |
| hsa-mir-224    | X     | X   | X   | X      |    |       |
| hsa-mir-26a-2  | X     | X   | X   | X      |    |       |
| hsa-mir-26b    | X     | X   |     | X      |    |       |
| hsa-mir-302e   |       |     |     |        | X  |       |
| hsa-mir-3139   |       |     |     |        | X  |       |
| hsa-mir-3170   |       |     |     | X      |    |       |
| hsa-mir-3197   |       |     |     |        |    | X     |
| hsa-mir-3617   |       |     |     |        |    | X     |
| hsa-mir-3622b  |       |     |     |        | X  |       |
| hsa-mir-3648   |       |     |     |        |    |       |
| hsa-mir-3648   |       |     |     |        |    |       |
| hsa-mir-3648   |       |     |     | X      |    |       |
| hsa-mir-3650   |       |     |     |        | X  |       |
| hsa-mir-3657   |       |     |     |        | X  |       |
| hsa-mir-3667   |       |     |     |        | X  |       |
| hsa-mir-3687   |       |     |     |        | X  |       |
| hsa-mir-3691   |       |     |     |        | X  |       |
| hsa-mir-378g   |       |     |     | X      |    |       |
| hsa-mir-3909   |       |     |     |        | X  |       |
| hsa-mir-3914-1 |       |     |     |        | X  |       |
| hsa-mir-3916   |       |     |     |        | X  |       |
| hsa-mir-4276   |       |     |     |        | X  |       |
| hsa-mir-4286   |       |     |     | X      |    |       |
| hsa-mir-4309   |       |     |     |        | X  |       |
| hsa-mir-4317   |       |     |     | X      |    |       |
| hsa-mir-4321   |       |     |     |        | X  |       |
| hsa-mir-4425   |       |     |     |        | X  |       |
| hsa-mir-4429   |       |     |     |        |    | X     |
| hsa-mir-4438   |       |     |     |        | X  |       |
| hsa-mir-4442   |       |     |     |        | X  |       |
| hsa-mir-4446   |       |     |     | X      |    |       |

| Gene           | Liver | HCC | HBV | Cancer | NA | Other |
|----------------|-------|-----|-----|--------|----|-------|
| hsa-mir-4448   | X     |     |     | X      |    |       |
| hsa-mir-4476   |       |     |     |        | X  |       |
| hsa-mir-4488   |       |     |     |        | X  |       |
| hsa-mir-4501   |       |     |     | X      |    |       |
| hsa-mir-452    | X     | X   |     | X      |    |       |
| hsa-mir-4648   |       |     |     |        | X  |       |
| hsa-mir-4662b  |       |     |     | X      |    |       |
| hsa-mir-4664   |       |     |     |        | X  |       |
| hsa-mir-4666a  |       |     |     |        | X  |       |
| hsa-mir-4681   |       |     |     |        | X  |       |
| hsa-mir-4682   |       |     |     |        | X  |       |
| hsa-mir-4698   |       |     |     |        | X  |       |
| hsa-mir-4703   |       |     |     |        | X  |       |
| hsa-mir-4710   |       |     |     |        | X  |       |
| hsa-mir-4740   |       |     |     |        | X  |       |
| hsa-mir-4770   |       |     |     |        | X  |       |
| hsa-mir-495    |       | X   |     | X      |    |       |
| hsa-mir-5006   |       |     |     |        | X  |       |
| hsa-mir-5095   |       |     |     |        | X  |       |
| hsa-mir-5193   |       |     |     |        | X  |       |
| hsa-mir-543    | X     |     |     | X      |    |       |
| hsa-mir-548a-2 |       |     |     |        |    | X     |
| hsa-mir-548p   |       |     |     |        | X  |       |
| hsa-mir-551b   |       | X   | X   |        |    |       |
| hsa-mir-552    |       |     |     | X      |    |       |
| hsa-mir-555    |       |     |     |        | X  |       |
| hsa-mir-5588   |       |     |     |        | X  |       |
| hsa-mir-5698   |       |     |     |        | X  |       |
| hsa-mir-576    |       |     |     | X      |    |       |
| hsa-mir-584    | X     |     |     | X      |    |       |
| hsa-mir-596    |       | X   |     | X      |    |       |
| hsa-mir-626    |       |     |     |        |    | X     |
| hsa-mir-639    |       |     |     | X      |    |       |
| hsa-mir-640    |       |     |     | X      |    |       |
| hsa-mir-663a   |       |     |     | X      |    |       |
| hsa-mir-663b   |       |     |     | X      |    |       |
| hsa-mir-943    |       | X   |     |        |    |       |
| hsa-mir-944    |       |     |     | X      |    |       |

**Table S3**  
 TF binding sites overlapping HBx peaks  
 (Genomatix MatInspector)

|           | NFAT | CREB | NFkB | p53 | STAT | E2F | SMAD |
|-----------|------|------|------|-----|------|-----|------|
| miR-224   |      |      |      |     |      |     |      |
| miR-129-1 |      |      |      |     |      |     |      |
| miR-138-2 |      |      |      |     |      |     |      |
| miR-302e  |      |      |      |     |      |     |      |
| miR-596   |      |      |      |     |      |     |      |
| miR-26a-2 |      |      |      |     |      |     |      |
| miR-26b   |      |      |      |     |      |     |      |
| miR-551b  |      |      |      |     |      |     |      |
| miR-552   |      |      |      |     |      |     |      |
| miR-1913  |      |      |      |     |      |     |      |
| miR-576   |      |      |      |     |      |     |      |
| miR-3648  |      |      |      |     |      |     |      |
| miR-21    |      |      |      |     |      |     |      |

**Table S4**  
miRNAs that activate or repress HBV replication

|                        | <b>HBV replication</b> | <b>Target / mechanisms</b> | <b>References</b> |
|------------------------|------------------------|----------------------------|-------------------|
| miR-1                  | up                     | HDAC4                      | 23                |
| miR-15a<br>miR-16-1    | down                   | Viral RNAs                 | 28                |
| miR-15b                | up                     | HNF1a                      | 24                |
| miR-17-92 cluster      | down                   | Viral RNAs                 | 29                |
| miR-122                | down                   | Cyclin G1-p53              | 20                |
| miR-130a               | down                   | PGC1a-PPAR $\gamma$        | 26                |
| miR-141                | down                   | PPAR $\alpha$              | 25                |
| miR-372/373            | up                     | nuclear factor I/B         | 21                |
| miR-199a-3p<br>miR-210 | down                   | Viral RNAs                 | 27                |
| miR-1231               | down                   | Viral RNAs                 | 30                |
| miR-501                | up                     | HBXIP                      | 22                |

**Table S5**  
miRNA seeds predicted in HBV pgRNA sequence and conserved across HBV genotypes  
(RNA-hybrid a)

| <b>miRNA</b> | <b>Seed 5p</b> | <b>Seed 3p</b> |
|--------------|----------------|----------------|
| 21           | -22,2 kcal/mol | -21,4 kcal/mol |
| 26a-2        | -17,8 kcal/mol | -19,6 kcal/mol |
| 26b          | -21,5 kcal/mol | -25,4 kcal/mol |
| 129-1        | -24,5 kcal/mol | -27,9 kcal/mol |
| 138-2        | -31,2 kcal/mol | -22,3 kmol/cal |
| 224          | -27 kcal/mol   | -25,8 kcal/mol |
| 302e         | -22,6 kcal/mol | /              |
| 452          | -25,6 kcal/mol | -19,7 kcal/mol |
| 551b         | -26,2 kcal/mol | -24,8 kmol/cal |
| 552          | -25 kcal/mol   | /              |
| 576          | -22,2 kcal/mol | -23,3 kcal/mol |
| 596          | -31,3 kcal/mol | /              |
| 1913         | -35 kcal/mol   | /              |
| 3648         | -29,8 kcal/mol | /              |
| 3687         | -24,6 kcal/mol | /              |

<sup>a</sup> KrugerJ & Rehmsmeier M, NAR 2006, 24, W451-W454

**Table S6**  
List of primers used throughout the manuscript

| ChIP primers   | Forward                          | Reverse                          |
|----------------|----------------------------------|----------------------------------|
| SREBP2         | 5'- CCCTCTCCAGCCTCAGACAATGA-3'   | 5'-GGCACATTCACCTGCTTGCTAACT-3'   |
| RAB1A          | 5'- AACTTGCACTACTGCCTCCTGTCA-3   | 5'-TTAGGCCACCAGGGATTGTCACT-3'    |
| RAB2B          | 5'- GCCACTGTGTCTGGCCATAATTT-3'   | 5'-CCCTTGATCCTTCTCCTGTTCCCT-3'   |
| RAB5B          | 5'- CTTGTTGGCTGGACATGGT-3'       | 5'-GCTATGGATGAGAGAATGGAGG-3'     |
| BECLIN1        | 5- CAGTACATCCTGAGCCAGAAC-3'      | 5-GGGTGCATGAAGAGGTATAGTC -3'     |
| TRAF2          | 5- CCCAGGTTCAAGTGATTTTCCT-3'     | 5'-CTGGGCATGGTGGCAGATGC-3'       |
| STAT1          | 5- GAGGCAGCCATTCGGAATCTA-3'      | 5'-CTCACCTCGCAACACCTGATCC-3'     |
| LAMA3          | 5- CACCATGCCTGGCTAAGT-3'         | 5'-TGATATCAAAGCGCAAGCA-3'        |
| DNMT3B         | 5- CCATAAAGTGACCTTCTGG-3'        | 5'-CTGCTGCTCCTCAATACACCAA-3'     |
| hsa-mir-21     | 5'-CCGGCATAGGTCCATCTCTGCA 3'     | 5'-TCAGCCGAAACTTCCCAGAG-3'       |
| hsa-mir-26a-2  | 5'-CACGTGGCCAGCACTGTAAATGA-3'    | 5'-GGTACTACTGATTTCCCTGCCTG -3'   |
| hsa-mir-26b    | 5'-AAAGAAGTGCACGGGCAACGG-3'      | 5'-GCGCTTTCCTCTCCCTCTGTGAA -3'   |
| hsa- mir-129-1 | 5'-TCTGGGCCTCACTTATGCCAC-3'      | 5'-ATGCTGGGAGAGCTGTGTGACCTT -3'  |
| hsa-mir-138-2  | 5'- ACCCTGGTACAAGCCAGAGGAAAT-3'  | 5'-ACAAGCTGAGGCGGGAAGACATAA-3'   |
| hsa-mir-224    | 5'-CAGAGCAACCCTGGAACACTCTT -3'   | 5'-AGCAGAACAAGATGCCTCTCACGA-3'   |
| hsa-mir-302e   | 5'-GAAGAGACAACACAGAAGCTCAGCAG-3' | 5'-CATGTTAGGTCATTGGGAAGTGAGGG-3' |
| hsa-mir-551B   | 5'-CAGAAACTGATGGGACTGATCTGC -3'  | 5'- TGACGAGATATAGTGGCTTGCCCTG-3' |
| hsa-mir-552    | 5'-GTGATGGACACACACACACACA-3'     | 5'-ACAGCTCACCACTTACCCAGAT -3'    |
| hsa-mir-576    | 5'- TTGGTCAAGAGTCAGAAGTTT -3'    | 5'- TGGCTTCTACTTGCCTTTCC -3'     |
| hsa-mir-596    | 5'-GGGAGGAAGGAAGGAAAGAAA -3'     | 5'-TCTGTGAAAGCTGGATGCTAA -3'     |
| hsa-mir-1913   | 5'-TTGAAAGTGTCTGCGCTATCC-3'      | 5'-ACCTGGGCTGAAGGAGATTA -3'      |
| hsa-mir-3648   | 5'-GGCCGTGCCTGAGGTTTCT -3'       | 5'-AACGGACGTGAAGCCGGTGA -3'      |

| mRNA primers | Forward                         | Reverse                      | Probe                     |
|--------------|---------------------------------|------------------------------|---------------------------|
| SREBP2       | 5'-GCCCTGGAAGTGACAGAGAG -3'     | 5'-TGCTTTCCAGGGAGTGA -3'     | #21, cat.no. 04686942001  |
| RAB1A        | 5'-GGGAAAACAATCAAGCTTCAA<br>-3  | 5'-CTGGAGGTGATTGTTCGAAAT -3' | #72, cat. no. 04688953001 |
| RAB2B        | 5'-ACAAATCAAATGCAAATCTGG<br>-3' | 5'-AACGGGTGATAGAACGGAAG -3'  | #61, cat. no. 04688597001 |
| RAB5B        | 5'-GCCAAGACAGCTATGAACGTG -3     | 5'-GCCAAGACAGCTATGAACGTG -3' | #72, cat.no. 04688953001  |
| BECLIN1      | 5'-GCAGCTGGATAAGCTGAAGA-3'      | 5'-CGACCCAGCCTGAAGTTATT-3'   |                           |

| miRNAs primers  |           |                  |           |
|-----------------|-----------|------------------|-----------|
| miRNAs          | Probe     | miRNAs           | Probe     |
| hsa-mir-21      | ID 000397 | hsa-mir-452      | ID 002329 |
| hsa-mir-26a     | ID 000405 | hsa-mir-551B -3p | ID 001535 |
| hsa-mir-26b     | ID 000407 | hsa-mir-551B -5p | ID 002346 |
| hsa-mir-33a     | ID 002135 | hsa-mir-552      | ID 001520 |
| hsa- mir-129-5p | ID 000590 | hsa-mir-576-3p   | ID 002351 |
| hsa- mir-129-3p | ID 002298 | hsa-mir-596      | ID 001550 |
| hsa-mir-138     | ID 002284 | hsa-mir-1913     | ID 121113 |
| hsa-mir-224     | ID 002099 | hsa-mir-3648     | ID 464401 |
| hsa-mir-302e    | ID 002802 | hsa-mir-3687     | ID 464645 |
| RNU38B          | ID 001004 |                  |           |

| <b>miRNAs PreMir</b>   |                      |
|------------------------|----------------------|
| hsa-mir-26a-5p PM10249 | hsa-mir-302e PM13467 |
| hsa-mir-138-5p PM11727 | hsa-mir-596 PM11608  |
| hsa-mir-224-5p PM12571 |                      |

| Primers specific for SEED sequences | Forward                        | Reverse                        |
|-------------------------------------|--------------------------------|--------------------------------|
| Seed1                               | 5'-ACCCTGTGACGAACATGGAGAACA-3' | 5'-ACACATCCAGCGATAACCAGGACA-3' |
| Seed2                               | 5'-ACAGGCTTTCACTTTCTCGCCAAC-3' | 5'-AGTTCCGATGAGCTTTGCTCCAGA-3' |
| Seed3                               | 5'-TTTCCATGGCTGCTAGGCTGTACT-3' | 5'-AACGTGCAGAGGTGAAGCGAAGT-3'  |
| Seed4                               | 5'-ATAAATTGGTCTGCGCACCAGCAC-3' | 5'-ACGGAAGGAAAGAAGTCAGAAGGC-3' |
